1                   **Primary souring: a novel bacteria-free method for sour beer production**

2   Kara Osburn<sup>a</sup>, Justin Amaral<sup>b</sup>, Sara R. Metcal<sup>a</sup>, David M. Nickens<sup>a</sup>, Cody M. Rogers<sup>a</sup>,  
3   Christopher Sausen<sup>a</sup>, Robert Caputo<sup>c</sup>, Justin Miller<sup>c</sup>, Hongde Li<sup>d</sup>, Jason M. Tennesen<sup>d</sup>, and  
4   Matthew L. Bochman<sup>a,c\*</sup>

5   <sup>a</sup>Molecular and Cellular Biochemistry Department, 212 South Hawthorne Drive, Simon Hall  
6   MSB1, room 405B, Indiana University, Bloomington, IN 47405, USA.  
7   [klosburn@uemail.iu.edu](mailto:klosburn@uemail.iu.edu)  
8   [srmetcal@indiana.edu](mailto:srmetcal@indiana.edu)  
9   [dnickens@indiana.edu](mailto:dnickens@indiana.edu)  
10  [codroger@indiana.edu](mailto:codroger@indiana.edu)  
11  [csausen@indiana.edu](mailto:csausen@indiana.edu)  
12  [bochman@indiana.edu](mailto:bochman@indiana.edu)

13  
14  <sup>b</sup>Mainiacal Brewing Company, Bangor, ME 04401, USA.  
15  [jamaral@mainiacalbrewingcompany.com](mailto:jamaral@mainiacalbrewingcompany.com)

16  
17  <sup>c</sup>Wild Pitch Yeast, Bloomington, IN 47405, USA.  
18  [rob@drinkin.beer](mailto:rob@drinkin.beer)  
19  [justin@blackacrebrewing.com](mailto:justin@blackacrebrewing.com)

20  
21  <sup>d</sup>Department of Biology, Indiana University, 1001 East Third Street, Bloomington, IN 47405,  
22  USA.  
23  [hongde.li@hotmail.com](mailto:hongde.li@hotmail.com)  
24  [jtenness@indiana.edu](mailto:jtenness@indiana.edu)

25  
26  \***Corresponding author:**  
27  Matthew L. Bochman, Ph.D.  
28  Assistant Professor  
29  Molecular and Cellular Biochemistry Department  
30  212 South Hawthorne Drive  
31  Simon Hall MSB1, room 405B  
32  Indiana University  
33  [bochman@indiana.edu](mailto:bochman@indiana.edu)  
34  812-856-2095

35 **Abstract**

36 In the beverage fermentation industry, especially at the craft or micro level, there is a movement  
37 to incorporate as many local ingredients as possible to both capture terroir and stimulate local  
38 economies. In the case of craft beer, this has traditionally only encompassed locally sourced  
39 barley, hops, and other agricultural adjuncts. The identification and use of novel yeasts in  
40 brewing lags behind. We sought to bridge this gap by bio-prospecting for wild yeasts, with a  
41 focus on the American Midwest. We isolated 284 different strains from 54 species of yeast and  
42 have begun to determine their fermentation characteristics. During this work, we found several  
43 isolates of five species that produce lactic acid and ethanol during wort fermentation:  
44 *Hanseniaspora vineae*, *Lachancea fermentati*, *Lachancea thermotolerans*, *Schizosaccharomyces*  
45 *japonicus*, and *Wickerhamomyces anomalus*. Tested representatives of these species yielded  
46 excellent attenuation, lactic acid production, and sensory characteristics, positioning them as  
47 viable alternatives to lactic acid bacteria (LAB) for the production of sour beers. Indeed, we  
48 suggest a new LAB-free paradigm for sour beer production that we term “primary souring”  
49 because the lactic acid production and resultant pH decrease occurs during primary fermentation,  
50 as opposed to kettle souring or souring via mixed culture fermentation.

51

52 **Keywords:** yeast, lactic acid, sour beer, heterolactic fermentation

53 **Chemical compounds studied in this article:**

54 Lactic acid (PubChem CID: 612); Ethanol (PubChem CID: 702)

55 **Abbreviations:** ABV, alcohol by volume; DIC, differential interference contrast; EtOH, ethanol;

56 FG, final gravity; gDNA, genomic DNA; IBU, international bittering unit; LAB, lactic acid

57 bacteria; LASSO, lactic acid specific soft-agar overlay; N-J, neighbor-joining; OG, original

58 gravity; WLN, Wallerstein Laboratories nutrient; YPD, yeast extract, peptone, and dextrose

59

## 60 **1. Introduction**

61           Currently, we are in the midst of a global craft beer boom, with the number of small  
62 independent breweries growing at a tremendous pace (1). This has led to increased competition,  
63 not only with the large macrobrewers but among the craft brewers themselves. As such, there is a  
64 need in the industry to differentiate oneself from, minimally, other local breweries. This has  
65 fueled experimentation with the core beer ingredients of water (2), malted grain (3), hops (4) and  
66 yeast (5), as well as with various adjuncts. Much of this experimentation is also focused on  
67 locally sourced ingredients to capture terroir and bolster the local economy (6,7).

68           Despite this widespread experimentation, the isolation and use of novel yeasts for  
69 brewing has lagged behind that of the other ingredients. This is in part due to the easy  
70 availability of numerous ale and lager strains from reputable commercial suppliers such as White  
71 Labs, Wyeast, and Lallemand (8). However, focusing on two species, *Saccharomyces cerevisiae*  
72 for ales and *Saccharomyces pastorianus* for lagers, naturally limits the genotypic and phenotypic  
73 variation available in brewing strains. This also translates into a limited palette of aromatic and  
74 flavor compounds made by these strains, especially considering their extremely high  
75 evolutionary relatedness (9,10).

76           To overcome this constraint, several laboratories and breweries have begun to culture  
77 wild yeasts and characterize their beer fermentation capabilities. Most efforts have focused on  
78 wild ale and lager strains (11,12) to increase the available genetic diversity of strains that  
79 naturally display high ethanol tolerance. However, multiple strains of yeasts in the  
80 *Brettanomyces*, *Hanseniaspora*, *Lachancea*, and *Pichia* genera (13-15) have also been  
81 investigated as alternative species for the production of beer.

82           We also recently began bio-prospecting for wild yeasts with desirable brewing  
83 characteristics (5). Here, we report the collection of nearly 300 strains from 26 genera. During  
84 trial wort fermentations, we found that strains from five species (*Hanseniaspora vineae*,  
85 *Lachancea fermentati*, *Lachancea thermotolerans*, *Schizosaccharomyces japonicus*, and  
86 *Wickerhamomyces anomalus*) were capable of heterolactic fermentation of sugar into lactic acid,  
87 ethanol, and CO<sub>2</sub>. Larger-scale brewing with four strains demonstrated that these yeasts are  
88 highly attenuative, flocculate well, yield appreciable levels of lactic acid, and produce pleasant  
89 aromatic and flavor compounds. We suggest a new paradigm for sour beer production called  
90 “primary souring” that avoids the use of lactic acid bacteria (LAB) and instead relies solely on  
91 lactic acid production by a heterofermentative yeast during primary fermentation.

92

## 93 **2. Materials and methods**

### 94 *2.1. Strains, media, and other reagents*

95           *S. cerevisiae* strain WLP001 was purchased from White Labs (San Diego, CA). Wild  
96 strains were isolated as described in (5). All yeast strains were routinely grown on yeast extract,  
97 peptone, and dextrose (YPD; 1% (w/v) yeast extract, 2% (w/v) peptone, and 2% (w/v) glucose)  
98 plates containing 2% (w/v) agar at 30°C and in YPD liquid culture at 30°C with aeration unless  
99 otherwise noted. All strains were stored as 15% (v/v) glycerol stocks at -80°C. Media  
100 components were from Fisher Scientific (Pittsburgh, PA, USA) and DOT Scientific (Burnton,  
101 MI, USA). All other reagents were of the highest grade commercially available.

### 102 *2.2. Strain identification and phylogenetic analysis*

103 To identify wild yeasts at the species level, frozen stocks were streaked onto YPD plates  
104 and incubated at 30°C until single colonies formed (18-48 h). Colonies were then picked into  
105 microcentrifuge tubes containing 100 µL of lysis solution (0.2 M LiOAc and 1% SDS) and  
106 incubated in a 65°C water bath for ≥15 min to lyse the cells. After 300 µL of 100% isopropanol  
107 was added to the tubes, they were mixed by vortexing, and the cell debris and genomic DNA  
108 (gDNA) were pelleted in a microcentrifuge for 5 min at maximum speed. The supernatant was  
109 decanted, and remaining traces were completely removed from the pellets by aspiration. The  
110 gDNA was resuspended in 50-100 µL TE buffer (10 mM Tris-HCl, pH 8, and 1 mM EDTA),  
111 and a 1-min spin at maximum speed was used to pellet the cell debris to clarify the DNA  
112 solution. The variable D1/D2 portion of the eukaryotic 26S rDNA was then amplified by PCR  
113 from the gDNA templates using oligos NL1 (GCATATCAATAAGCGGAGGAAAAG) and  
114 NL4 (GGTCCGTGTTTCAAGACGG) (11) and the following cycling conditions: 98°C for 5  
115 min; 35 cycles of 98°C for 30 s, 55°C for 30 s, and 72°C for 30 s; and 72°C for 10 min. The  
116 PCRs were assessed for D1/D2 amplification by running 10% of the reaction volume on 1%  
117 (w/v) agarose gels at 100 V (560 bp expected product size). The amplified DNA was then  
118 purified using a PCR Purification Kit (Thermo Scientific, Waltham, MA) and quantified using a  
119 BioTek Synergy H1 plate reader. The DNA was sequenced by ACGT, Inc. (Wheeling, IL) using  
120 primer NL1, and the sequence was used to query the National Center for Biotechnology  
121 Information nucleotide database with the Basic Local Alignment Search Tool (BLAST;  
122 [http://blast.ncbi.nlm.nih.gov/Blast.cgi?CMD=Web&PAGE\\_TYPE=BlastHome](http://blast.ncbi.nlm.nih.gov/Blast.cgi?CMD=Web&PAGE_TYPE=BlastHome)).

123 After species identification, the phylogenetic relationships among the isolated strains of  
124 *H. vineae*, *L. fermentati*, *L. thermotolerans*, *S. japonicus*, and *W. anomalus* were determined by  
125 aligning their 26S rDNA sequences using ClustalX (16). The alignments were iterated at each

126 step but otherwise utilized default parameters. ClustalX was also used to draw and bootstrap  
127 neighbor-joining (N-J) phylogenetic trees using 1000 bootstrap trials; the trees were visualized  
128 with TreeView v. 1.6.6 software (<http://taxonomy.zoology.gla.ac.uk/rod/rod.html>). The  
129 *Schizosaccharomyces pombe* rDNA sequence (GenBank accession HE964968) was included in  
130 the alignments as the outgroup, and this was used to root the N-J tree in TreeView. WLP001 was  
131 included to determine the relatedness of the wild strains to a commercially available ale yeast.

132

### 133 *2.3. Test fermentations*

134 For laboratory-scale fermentations, select yeast strains were streaked for single colonies  
135 onto YPD plates as described above and grown to saturation in 4 mL of YPD liquid medium  
136 overnight at 30°C with aeration. The cell count of the starter cultures was approximated by  
137 measuring the OD<sub>660</sub> and converting that value to cells/mL as described at  
138 <http://www.pangloss.com/seidel/Protocols/ODvsCells.html>. In most cases, the saturated  
139 overnight cultures reached densities of  $\sim 5 \times 10^8$  cells/mL. These starter cultures were then used to  
140 inoculate  $\sim 400$  mL of blonde ale wort in 500 mL glass bottles capped with drilled rubber  
141 stoppers fitted with standard plastic airlocks. The wort was produced by mashing 65.9% Pilsner  
142 (2 Row) Bel and 26.9% white wheat malt at 65°C (149°F) for 75 min in the presence of 1 g/bbl  
143 CaCO<sub>3</sub> and 1.67 g/bbl CaSO<sub>4</sub> to yield an original gravity (OG) of 1.044. During the boil, 7.2%  
144 glucose was added, as well as Saaz hops to 25 international bittering units (IBUs). The  
145 fermentation cultures were incubated at 22.3±0.3°C (~72°F) for 2 weeks. Un-inoculated wort  
146 was treated as above to control for wort sterility. Prior to bottling into standard 12-oz brown  
147 glass bottles, their final gravity (FG) was measured using a MISCO digital refractometer (Solon,

148 OH), and pH was measured using an Accumet AB150 pH meter (Fisher Scientific). Bottle  
149 conditioning was conducted as in (17) at room temperature for  $\geq 2$  weeks.

150 Small-batch fermentations were performed at Mainiacal Brewing in Bangor, ME. To  
151 produce the test wort, 93.4% two-row base malt and 6.6% carapils were mashed at 66.7°C  
152 (152°F) to yield an OG of 1.046. During the boil, Loral hops were added to a final concentration  
153 of 5.3 IBUs. The wort was then chilled and split into 5-gal portions in separate carboys.  
154 Approximately  $1 \times 10^{11}$  cells of the indicated yeast strains were used to inoculate the carboys and  
155 allowed to ferment under anaerobic conditions at 21.7°C (71°F) for 1 month. Gravity  
156 measurements were taken both with a hydrometer and refractometer by standard methods. The  
157 final pH was recorded prior to bottling and bottle conditioning as above.

#### 158 *2.4. Lactic acid specific soft-agar overlay (LASSO)*

159 The production of lactic acid by yeast cells was assayed as described in (18). Briefly,  
160 cells were grown overnight in liquid YPD medium at 30°C with aeration. Then, 2  $\mu\text{L}$  of each  
161 culture was spotted onto YPD10 plates (YPD agar supplemented with glucose to a final  
162 concentration of 10% w/v), allowed to absorb, and incubated overnight at 30°C. The plates were  
163 then covered with 6.5 mL soft-agar (0.5% agar in 300 mM Tris and 187 mM glutamate, pH 8.3).  
164 Upon solidification of the soft agar, a second soft-agar overlay was prepared by mixing 3.2 mL  
165 1% agar with 3.2 mL of a staining solution composed of 30 mM Tris/18.75 mM glutamate (pH  
166 8.3), 2.5 mM NAD, 0.5 mg/mL nitrotetrazolium blue, 125  $\mu\text{g}/\text{mL}$  phenazine methosulfate, 7 U  
167 glutamate pyruvate transaminase, and 7 U L[+]-lactate dehydrogenase (all LASSO components  
168 were from Sigma-Aldrich, St. Louis, MO). Strains producing lactic acid formed purple halos



169 within 10 min, the color of which darkened with increasing incubation time at room temperature.  
170 Cells not producing lactic acid never formed halos.

### 171 *2.5. Multi-well lactic acid production assay*

172 Because only a small number of strains can be tested for lactic acid production on a  
173 single plate in the LASSO assay, we also adapted it for use in multi-well plates. Briefly,  
174 individual strains were grown overnight in 100  $\mu$ L YPD10 medium in the wells of 96-well plates  
175 at 30°C with aeration in a BioTek Synergy H1 plate reader. To avoid evaporation of the medium,  
176 50  $\mu$ L mineral oil was used to overlay each well. Then, 100  $\mu$ L of staining solution (30 mM  
177 Tris/18.75 mM glutamate (pH 8.3), 2.5 mM NAD, 0.5 mg/mL nitrotetrazolium blue, 125  $\mu$ g/mL  
178 phenazine methosulfate, 1 U/mL glutamate pyruvate transaminase, and 1 U/mL L[+]-lactate  
179 dehydrogenase) was added to each well and mixed by agitation in the plate reader. The reaction  
180 proceeded for  $\geq$  10 min at room temperature, and the presence of lactic acid was indicated by the  
181 gold colored solution turning green (and eventually blue with extended incubation).

### 182 *2.6. Beer sensory analysis*

183 Sensory analysis was performed by 10 volunteers with various levels of experience, from  
184 neophytes to those with Beer Judge Certification Program (19) training. In all cases, the sensory  
185 descriptors (*e.g.*, Barnyard, Bitter, Body, Drinkability, Dry, Estery, Harsh, Hoppy, Malty,  
186 Papery, Sour, Sulfury, and Sweet in Supplemental Fig. S3) were defined and described to the  
187 participants, and commercial calibrations beers were used as examples of sour (Cauldron;  
188 Upland Brewing Company, Bloomington, IN, USA) and clean beers (Dragonfly IPA; Upland  
189 Brewing Company). Then, chilled samples of the experimental beers were provided to the  
190 volunteers, and they were instructed to write down aroma and flavor descriptions, as well as to

191 rank each of the Supplemental Figure S3 flavor descriptors on a 1-10 scale. These analyses were  
192 performed in a blinded manner, with none of the participants knowing which yeast strains  
193 fermented the beers. After individual assessments, the group discussed the sensory attributes of  
194 each beer to come to a consensus on the best descriptions of aroma and flavor, which are  
195 reported throughout this work.

## 196 *2.7. Gas chromatography-mass spectrometry (GC-MS) analysis of lactic acid*

197 To determine the concentration of lactic acid in beer samples, 20  $\mu$ L of beer and lactate  
198 standards were individually added to 900  $\mu$ L of 90% methanol containing 1.25  $\mu$ g/mL succinic-  
199 d4 acid in 1.5-mL microfuge tubes. The samples were vortexed for 10 s, incubated for 1 h at -  
200 20°C, and centrifuged at 20,000 x g for 5 min at 4°C. The cleared supernatants were transferred  
201 to 1.5-mL tubes and dried overnight using a vacuum centrifuge (Savant). Subsequent  
202 derivatization and GC-MS analysis were performed as previously described (20). Lactate  
203 concentration was determined using a standard curve plotted from the analyzed lactate standards  
204 of known concentration.

205

## 206 **3. Results**

### 207 *3.1. Discovery of five heterofermentative yeast species*

208 We previously reported an initial description of our bio-prospecting and characterization  
209 of 100 wild yeasts for use in the brewing industry (5). We have increased our collection to 284  
210 strains from 54 different species in 26 genera (Supplemental Table 1). To determine the relative  
211 usefulness of these strains in beer brewing, small laboratory-scale beer fermentations were

212 performed for each isolate. During our sensory analyses of the resultant beers, we noted that  
213 many of the strains were producing beers that were characterized as tart or sour (Table 2), akin to  
214 styles that are produced with the aid of LAB (21). Initially, we hypothesized that these  
215 experimental beers may have been contaminated by LAB. However, when we phylogenetically  
216 grouped these strains, we found that they were all members of five species in four genera: *H.*  
217 *vineae*, *L. fermentati*, *L. thermotolerans*, *S. japonicus*, and *W. anomalus* (Supplemental Table 1  
218 and Fig. 1). Because these strains were not randomly distributed throughout the many species in  
219 our collection, we hypothesized that the yeasts may be producing the lactic acid themselves. To  
220 determine if this apparent heterofermentative activity was specific to evolutionarily closely  
221 related yeasts, we aligned the sequences of the D1/D2 variable region of their ribosomal DNA  
222 and plotted a phylogenetic tree. As shown in Figure 1 and Figure S1, three of the species (*H.*  
223 *vineae*, *L. fermentati*, and *L. thermotolerans*) are closely related to ale yeast (WLP001), but the  
224 other two (*S. japonicus*, and *W. anomalus*) form more distinct clades, with the divergence  
225 between budding yeasts such as *S. cerevisiae* (e.g., WLP001) and fission yeasts such as *S.*  
226 *japonicus* (e.g., YH156) occurring approximately 1 billion years ago (22).

227         Regardless of their evolutionary relationships, the strains listed in Table 2 and other  
228 isolates of the same species (data not shown) varied in their fermentative activities. Their levels  
229 of attenuation varied from 40-83%, with decreases in the initial pH of 5.0 to as low as 3.21.  
230 Although some of these differences may be attributable to differences among the species  
231 themselves, intra-species differences were also noted, especially during sensory analyses. For  
232 instance, *L. thermotolerans* YH73 produced a “very sour” flavor with berry notes, but the same  
233 beer fermented with *L. thermotolerans* YH79 was characterized as only “slightly tart” yet clean  
234 and rounded (Table 2).

235 3.4. Strains *L. fermentati* WYP39, *H. vineae* YH72, *W. anomalus* YH82, *L. thermotolerans*  
236 *YH140*, and *S. japonicus* YH156 produce lactic acid

237 We further sought to determine if strains *L. fermentati* WYP39, *H. vineae* YH72, *W.*  
238 *anomalus* YH82, *L. thermotolerans* YH140, and *S. japonicus* YH156 were truly producing lactic  
239 acid during fermentation, rather than one or more other secondary metabolites that yield a  
240 tart/sour flavor (23). Using the LASSO assay for lactic acid production by yeast (18), we found  
241 that all five strains produced lactic acid (denoted by dark halos in Fig. 2A), similar to the  
242 *Lactobacillus plantarum* positive control. In contrast, the *S. cerevisiae* WLP001 negative control  
243 failed to generate a halo. Because the LASSO assay can only be used for a limited number of  
244 strains on a single plate, we adapted it into a multi-well plate assay (Fig. 2B). Here, lactic acid  
245 production is evident by the golden-colored assay medium turning green, as indicated by the  
246 LAB controls. Again, WLP001 failed to generate detectable lactic acid, as did a common  
247 research strain of *E. coli*. However, multiple tested isolates of *L. thermotolerans*, *L. fermentati*,  
248 *H. vineae*, *S. japonicus*, and *W. anomalus* did test positive for lactic acid production. Some  
249 individual *L. thermotolerans* strains failed to generate lactic acid (wells 2 and 4) or did so slowly,  
250 as certain wells were just beginning to turn green (well 3) when the image in Figure 2B was  
251 acquired. These results correspond with sensory analysis of beers fermented with the various *L.*  
252 *thermotolerans* strains, which ranged from not sour to very tart (Table 2 and data not shown).

253 3.4. Analysis of beers fermented with lactic acid-producing yeasts

254 To monitor the activities of *L. fermentati* WYP39, *H. vineae* YH72, *W. anomalus* YH82,  
255 and *S. japonicus* YH156 in larger-scale fermentations, we inoculated these strains into glass  
256 carboys containing 19 L (5 gal) each of an identical blonde wort. Because the beer brewing

257 capabilities of a *L. thermotolerans* strain were recently described (14), we omitted strain *L.*  
258 *thermotolerans* YH140 from these assays to avoid generating redundant data. All of the strains  
259 had short lag times (*i.e.*, the approximate time from inoculation to the first visible signs of  
260 fermentation) ranging from 6-14 h (Table 3). These lag times to fermentation were similar to that  
261 of WLP001 inoculated in a similar blonde wort (~12 h, Table 3). However, the kinetics of the  
262 full fermentation differed for each lactic acid-producing yeast. *L. fermentati* WYP39 had the  
263 shortest lag time and fermented rapidly for 2 weeks, at which point it slowed considerably and  
264 required an additional 2 weeks to reach a final gravity of 0.099 (Table 3). *H. vineae* YH72 was a  
265 slow and steady fermenter, attaining a terminal gravity of 1.000 after 3 weeks. *W. anomalus*  
266 YH82 was similar, but required a full 4 weeks to reach a final gravity of 1.001.

267         The *S. japonicus* YH156 strain displayed the most variant fermentative characteristics.  
268 After reaching a vigorous state of fermentation at 14 h (Table 3), popcorn-like clusters of cells  
269 formed and floated around within the fermenter (Supplemental Fig. 2). Eventually, they settled  
270 into a mountainous pile against one side of the carboy before compacting down into a yeast  
271 slurry with a typical appearance on the bottom of the fermenter. The fermentation reached a final  
272 gravity of 0.099 approximately 27 days after inoculation. The final pH of each beer was recorded  
273 and varied from a low of 3.20 to a high of 3.74. Sensory analyses of each beer were conducted  
274 (Supplemental Fig. 3), and the tasting notes are discussed in Sections 4.1-4.5 below.

275         We also quantified the concentration of L-lactic acid present in each beer by GC-MS  
276 (Fig. 2C and S4). We used Cauldron, a commercially available sour beer made by mixed  
277 fermentation of yeast and LAB (17), as a positive control for lactic acid production; it contained  
278 100.54 mM lactate. Based on a lactate standard curve, *L. fermentati* WYP39, *H. vineae* YH72,

279 *W. anomalus* YH82, and *S. japonicus* YH156 produced 10.02, 35.69, 29.05, and 50.09 mM  
280 lactate, respectively.

281 The *S. japonicus* YH156 results contrast with those from the LASSO assay in Figure 2A,  
282 where *S. japonicus* YH156 displayed the least evidence of lactic acid production. Because the  
283 lactic acid production occurred in the presence of oxygen in the LASSO assay, this may indicate  
284 that *S. japonicus* YH156 is Crabtree negative or only weakly Crabtree positive, *i.e.*, requiring  
285 anaerobic conditions for fermentation (see (24) and references therein). It should also be noted  
286 that the beers analyzed by GC-MS were fermented in a brewery that utilizes LAB, and thus, it  
287 remains a formal possibility that they may have been inadvertently contaminated by other  
288 organisms that can generate lactic acid. However, the results in Figures 2A and 2B are from pure  
289 cultures (as judged by post-fermentation plating, microscopy, and PCR analyses of the yeast  
290 slurry for LAB contamination; Supplemental Fig. 5 and data not shown) of *L. fermentati*  
291 WYP39, *H. vineae* YH72, *W. anomalus* YH82, and *S. japonicus* YH156. These cultures also still  
292 acidified beer during fermentation in the presence of antibiotics or 75 IBU wort in a laboratory  
293 setting (Supplemental Table 2), strongly suggesting that LAB contamination was not the source  
294 of the lactic acid.

#### 295 **4. Discussion**

296 The next phase in the “local” movement in the beer industry will be the isolation and use  
297 of local yeast strains in brewing. Indeed, in the U.S., nearly all commercially available ale and  
298 lager strains are of European origin, so no American beer will ever truly be local without the  
299 inclusion of New World yeast. Here, we detailed the initial characterization of nearly 300 local  
300 strains for use in fermentation. Within this strain bank, we uncovered five species that generate

301 lactic acid and ethanol during primary fermentation and suggest that they can be used in a novel,  
302 LAB-free beer souring method (see Section 4.6. below).

#### 303 4.1. *H. vineae*

304 To our knowledge, this is the first report of pure cultures of *H. vineae* being used to  
305 ferment beer. As the species name suggests, *H. vineae* is typically associated with wine, where it  
306 has previously been investigated alone and in combination with *S. cerevisiae* for grape must  
307 fermentation (25-27). The strains previously tested are notable for the production of high levels  
308 of 2-phenylethyl acetate, which is an aromatic compound that lends floral, fruity, and/or honey-  
309 like notes to wine (26). Indeed, in our trial fermentations with *H. vineae* YH72, we often noted  
310 fruity aromas and flavors (Tables 2 and 3).

311 Although yeasts in the *Hansenia* genus are the predominant species found on grapes (28-  
312 30), they are also found elsewhere (reviewed in (31)). Strain *H. vineae* YH72 was isolated from a  
313 white ash tree (*Fraxinus americana*) in southwestern Pennsylvania (Table 2) and was the only  
314 *Hanseniaspora* isolate to consistently produce tart beer (see Supplemental Table 3). It ferments  
315 slowly relative to typical commercially available ale yeasts, but reached high levels of  
316 attenuation after only two weeks (Table 2) and further attenuated with additional fermentation  
317 time (Table 3). The beers produced by short fermentations with *H. vineae* YH72 were slightly  
318 sour but clean and highly drinkable, with notes of apple cider. Longer fermentation yielded very  
319 sour beer with a pH (3.23) and acidic bite reminiscent of beers produced with LAB, as well as  
320 stone fruit notes (Table 3, Supplemental Fig. 3). Currently, we are further characterizing the  
321 fermentative capabilities and acid production of *H. vineae* YH72 and other *Hansenia* species.

#### 322 4.2. *L. fermentati*

323           Very little is known about *L. fermentati*, especially with regard to beverage fermentation.  
324 Industrially, this species of yeast has been found in fermented (wine (32), cachaça (33), and  
325 water kefir (34)) and non-fermented beverages (coconut water and fruit juices (35)). However,  
326 its effects on the sensory characteristics of these beverages are largely unknown. As with *H.*  
327 *vineae* YH72 above, this also appears to be the first report of beer fermented with pure cultures  
328 of *L. fermentati*. Our laboratory-scale test fermentations indicated that strain WYP39 displayed  
329 decent wort attenuation for a wild strain (60%, Table 2), and longer fermentation in a larger-  
330 scale fermentation yielded a dry product (Table 3). The final pH was modest compared to other  
331 sour beers (Table 3), creating a flavor that was more tart than sour, but this was accentuated by  
332 light pineapple and mango flavors. There are many species in the *Lachancea* genus (36). Based  
333 on the desirable brewing characteristics of *L. fermentati* and *L. thermotolerans* (discussed below  
334 in Section 4.3. and in Domizio *et al.* (14)), it will be interesting to assess the activities of these  
335 other species during beer fermentation.

#### 336 4.3. *L. thermotolerans*

337           Various strains of *L. thermotolerans* have been studied for their effects on wine  
338 fermentation (reviewed in (29)), though usually in co-fermentations with *S. cerevisiae* (*e.g.*,  
339 (37,38)). Recently, *L. thermotolerans* strain Lt101 was shown to be a viable yeast for beer  
340 production (14), and the same group also found that three *L. thermotolerans* strains including  
341 Lt101 produce lactic acid during fermentation. Although this is similar to our observations  
342 (Table 2 and data not shown), the strains investigated by Domizio *et al.* (14) only decreased the  
343 pH of wort from 5.66 to 4.28-3.77 during fermentation. Most of their experiments yielded final  
344 pH values in the 4.17-4.3 range, however, which is similar to the pH decrease caused by *S.*  
345 *cerevisiae* UCD 915. Our *L. thermotolerans* isolates that produced noticeably tart beers reached



346 terminal pH values of ~3.35 (Table 2 and data not shown). These discrepancies are likely due to  
347 differences in the experimental set ups, as well as strain-to-strain variability, which is discussed  
348 in Section 5 below.

#### 349 4.4. *S. japonicus*

350 *S. japonicus* is closely related to *S. pombe*, which was originally isolated from African  
351 millet beer (reviewed in (39)). *S. japonicus* itself was first isolated from strawberries in Japan  
352 (40) and is associated with indigenous fermented beverages (*e.g.*, kaffir beer, plantain beer, palm  
353 wine, sugar cane wine, and sake) around the world (41), wine production (42), and was isolated  
354 from spontaneously fermented beer in North Carolina (43). However, no characterization of that  
355 beer is available. Thus, this is the first rigorous report of *S. japonicus* used for primary  
356 fermentation of beer. The attenuation levels of strain *S. japonicus* YH156 were excellent in both  
357 laboratory- and large-scale fermentations (Table 2 and 3), and the aroma and flavor profiles of  
358 these beers included common descriptors of sour, fruity, and stone fruit. Individual tasters  
359 identified green apple Jolly Rancher, tart apple, pear, pineapple, and peach notes.

#### 360 4.5. *W. anomalus*

361 *W. anomalus*, previously known as *Saccharomyces anomalus* (44), has multiple roles in  
362 the biotechnology, agriculture, and food production fields. It is often found in association with  
363 grain and is especially useful to inhibit storage molds during malting (45). Concerning beverage  
364 fermentation, *W. anomalus* is generally referred to as a beer spoilage organism (46), but it is also  
365 necessary for cocoa and coffee bean fermentation (47). Although *W. anomalus* has been  
366 investigated for its use in apple wine and hard cider production (48,49), the only work involving  
367 beer has focused on the spoilage properties of this species (46). As with *S. japonicus* YH156

368 above, the YH82 strain of *W. anomalus* yielded excellent attenuation at both fermentation scales  
369 tested (Tables 2 and 3). This strain produced a less intense sour character than others, but the  
370 beer was characterized as clean, aromatic, and fruity with notes of pear, apple, and apricot.

#### 371 4.6. Primary souring

372 There are two general methods by which sour beers are produced: kettle souring and  
373 mixed culture fermentation (Fig. 3) (21). Kettle souring is the more rapid and modern technique.  
374 This method affords brewers tight control over acid production (souring can be stopped at any  
375 time via boiling) and is less time consuming than mixed culture fermentation (below), but it also  
376 has inherent weaknesses. First, the entire souring process occurs in the brew kettle, so it prevents  
377 additional wort production in that vessel. Indeed, kettle souring is often relegated to weekends  
378 when small breweries are otherwise not in production mode. Second, boiling the wort after it has  
379 been soured drives off volatile aromatics that may also have been produced during souring,  
380 yielding beers that are described and criticized as lacking in depth and character. To combat  
381 some of these sensory downsides, some brewers are now barrel aging kettle sours to impart oak  
382 complexity to the final beers.

383 In contrast, souring by mixed culture fermentation is the more traditional method. It  
384 produces more complex and nuanced flavors in beer than kettle souring, but it suffers from a  
385 huge time lag from wort production to the final beer and requires a large space dedicated to  
386 housing the barrels. Further, the souring organisms are usually alive throughout the beer  
387 production and packaging processes, so separate equipment is usually necessary to prevent the  
388 accidental contamination of non-sour (*i.e.*, clean) beers.

389           Here, we propose a third paradigm for sour beer production that we call primary souring.  
390   In this method, the wort is inoculated with a yeast capable of heterolactic fermentation rather  
391   than *S. cerevisiae*, and souring occurs during primary fermentation in the absence of LAB (Fig.  
392   3). The yeast strains described in Tables 2 and 3 and in the text above did not display rapid  
393   fermentation kinetics like commercially available ale yeasts, but they still completed  
394   fermentation within a month, displaying excellent levels of attenuation and medium-to-high  
395   flocculation (Table 3). Further, the sensory profiles of the beers were superior to kettle soured  
396   beer, displaying both lactic tartness and fruity aromatic and flavor notes. Compared to the sour  
397   production methods above, primary souring is beneficial in that it frees up the brew kettle and  
398   does not require lengthy aging in barrels, though oak aging is a possibility after primary  
399   fermentation (Fig. 3). Perhaps most alluringly, primary souring does not require the introduction  
400   of bacteria into the brewery, and preliminary tests suggest that *H. vineae*, *L. fermentati*, *L.*  
401   *thermotolerans*, *S. japonicus*, and *W. anomalus* can be eliminated as easily as *S. cerevisiae* from  
402   brewing equipment using standard clean-in-place protocols. As is typical of yeasts, these species  
403   are also hop tolerant (Supplemental Table 2), enabling more liberal use of hops in wort  
404   production for sour beers. However, it should be noted that yeast growth can be inhibited by hop  
405   iso- $\alpha$ -acids in acidic milieus (50), so the absolute levels of hop tolerance will likely vary by  
406   strain and the desired pH of the sour beer.

407

## 408   **5. Conclusions and Outlook**

409           We set out to isolate and characterize new yeasts for use in beer fermentation. Here, we  
410   highlight the discovery of a set of yeast species that produce both lactic acid and ethanol during

411 primary fermentation. It is unclear how widespread this heterolactic fermentation phenotype is  
412 among ethanol-tolerant yeasts, but its presence in the fission yeast *S. japonicus* and budding  
413 yeasts like *H. vineae*, which are separated by ~1 billion years of evolution (22), may indicate that  
414 heterolactic fermentation is an ancient and conserved metabolic process among single-celled  
415 fungi. Arguing against this hypothesis is the lack of detectable lactic acid production by related  
416 strains of the same species, *e.g.*, differences among *L. thermotolerans* isolates ((14) and data not  
417 shown). Whole genome sequencing and/or transcriptomic analysis of lactic acid-producing yeast  
418 during fermentation is needed to determine how the heterolactic fermentation occurs. Regardless,  
419 it is our hope that the strains described above and the primary souring process put forth here will  
420 add strength to the already growing sour beer movement in the U.S. and abroad.

421

## 422 **Acknowledgements**

423 We thank Andrea Baillo, Elise Bochman, Henri Bochman, Chris Boggess, Kris Brown, Shannon  
424 Brown, Adam Covey, Sara Davidson, Jeff Ewer, Todd Green, Ted Herrera, Austin Kelley, Steve  
425 Llewelyn, Andrew Mason, Colin McCloy, Jared Miller, Ted Miller, Sasha Pefferman, Adam  
426 Quirk, Kevin Smolar, Jack Sramek, Caleb Staton, Julia van Kessel, and Linda van Kessel for  
427 collecting samples for our yeast hunting projects.

428

## 429 **References**

- 430 1. Jones, L. (2016). National Beer Wholesalers Association,  
431 [https://www.nbwa.org/resources/permitted-breweries-hit-another-record-2016-](https://www.nbwa.org/resources/permitted-breweries-hit-another-record-2016-7190?utm_source=Daily+Brew&utm_campaign=11191ec188-)  
432 [7190?utm\\_source=Daily+Brew&utm\\_campaign=11191ec188-](https://www.nbwa.org/resources/permitted-breweries-hit-another-record-2016-7190?utm_source=Daily+Brew&utm_campaign=11191ec188-7190?utm_source=Daily+Brew&utm_campaign=11191ec188-)

- 433 [The+Daily+Brew%3A+January+12%2C+2017&utm\\_medium=email&utm\\_term=0\\_935](http://www.thebrewer.com/2017/01/22/developing-new-barely-varieties-a-work-in-progress/)  
434 [b7e0b70-11191ec188-36689953](http://www.thebrewer.com/2017/01/22/developing-new-barely-varieties-a-work-in-progress/).
- 435 2. Brungard, M. (2014) Calcium and Magnesium in Brewing Water. *The New Brewer*, **31**,  
436 80-88.
- 437 3. So, A. (2014) Developing New Barely Varieties: a Work in Progress. *The New Brewer*,  
438 **31**, 60-68.
- 439 4. Bernstein, J.M. (2010), *Imbibe Magazine*, Portland, OR.
- 440 5. Osburn, K., Ahmad, N.N. and Bochman, M.L. (2016) Bio-prospecting, selection, and  
441 analysis of wild yeasts for ethanol fermentation. *Zymurgy*, **39**, 81-88.
- 442 6. Kallenberger, M. (2016) Local Sourcing from the Craft Beer Drinker's Perspective. *The*  
443 *New Brewer*, **34**, 84-88.
- 444 7. Hieronymus, S. (2016) The Importance of Being Local. *The New Brewer*, **34**, 90-96.
- 445 8. Carpenter, D. (2014), *Craft Beer & brewing*. Unfiltered Media Group, LLC,  
446 <http://beerandbrewing.com/VKRJ0isAAF-R9GMY/article/liquid-vs.-dry-yeast>.
- 447 9. Borneman, A.R., Forgan, A.H., Kolouchova, R., Fraser, J.A. and Schmidt, S.A. (2016)  
448 Whole Genome Comparison Reveals High Levels of Inbreeding and Strain Redundancy  
449 Across the Spectrum of Commercial Wine Strains of *Saccharomyces cerevisiae*. *G3*.
- 450 10. Gallone, B., Steensels, J., Prahl, T., Soriaga, L., Saels, V., Herrera-Malaver, B.,  
451 Merlevede, A., Roncoroni, M., Voordeckers, K., Miraglia, L. *et al.* (2016) Domestication  
452 and Divergence of *Saccharomyces cerevisiae* Beer Yeasts. *Cell*, **166**, 1397-1410 e1316.
- 453 11. Lee, Y.J., Choi, Y.R., Lee, S.Y., Park, J.T., Shim, J.H., Park, K.H. and Kim, J.W. (2011)  
454 Screening wild yeast strains for alcohol fermentation from various fruits. *Mycobiology*,  
455 **39**, 33-39.
- 456 12. Sampaio, J.P. and Goncalves, P. (2008) Natural populations of *Saccharomyces*  
457 *kudriavzevii* in Portugal are associated with oak bark and are sympatric with *S. cerevisiae*  
458 and *S. paradoxus*. *Applied and environmental microbiology*, **74**, 2144-2152.
- 459 13. Steensels, J. and Verstrepen, K.J. (2014) Taming wild yeast: potential of conventional  
460 and nonconventional yeasts in industrial fermentations. *Annu Rev Microbiol*, **68**, 61-80.
- 461 14. Domizio, P., House, J.F., Joseph, C.M.L., Bisson, L.F. and Bamforth, C.W. (2016)  
462 *Lachancea thermotolerans* as an alternative yeast for the production of beer. *Journal of*  
463 *the Institute of Brewing*, **122**, 599-604.
- 464 15. Lentz, M. (2014) Isolating Wild Yeast Strains. *Zymurgy*, **37**, 54-59.
- 465 16. Larkin, M.A., Blackshields, G., Brown, N.P., Chenna, R., McGettigan, P.A., McWilliam,  
466 H., Valentin, F., Wallace, I.M., Wilm, A., Lopez, R. *et al.* (2007) Clustal W and Clustal  
467 X version 2.0. *Bioinformatics*, **23**, 2947-2948.
- 468 17. Rogers, C.M., Veatch, D., Covey, A., Staton, C. and Bochman, M.L. (2016) Terminal  
469 acidic shock inhibits sour beer bottle conditioning by *Saccharomyces cerevisiae*. *Food*  
470 *Microbiol*, **57**, 151-158.
- 471 18. Witte, V., Krohn, U. and Emeis, C.C. (1989) Characterization of yeasts with high L[+]-  
472 lactic acid production: lactic acid specific soft-agar overlay (LASSO) and TAFE-patterns.  
473 *J Basic Microbiol*, **29**, 707-716.
- 474 19. (2017), <https://www.bjcp.org/>, Vol. 2017.
- 475 20. Tennessen, J.M., Barry, W.E., Cox, J. and Thummel, C.S. (2014) Methods for studying  
476 metabolism in *Drosophila*. *Methods*, **68**, 105-115.
- 477 21. Tonsmeire, M. (2014) *American Sour Beer: Innovative Techniques for Mixed*  
478 *Fermentations*. Brewers Publications, Boulder, CO.

- 479 22. Hedges, S.B. (2002) The origin and evolution of model organisms. *Nat Rev Genet*, **3**,  
480 838-849.
- 481 23. Ramos Da Conceicao Neta, E.R., Johanningsmeier, S.D. and McFeeters, R.F. (2007) The  
482 chemistry and physiology of sour taste--a review. *J Food Sci*, **72**, R33-38.
- 483 24. Hagman, A., Sall, T., Compagno, C. and Piskur, J. (2013) Yeast "make-accumulate-  
484 consume" life strategy evolved as a multi-step process that predates the whole genome  
485 duplication. *PLoS One*, **8**, e68734.
- 486 25. Viana, F., Belloch, C., Valles, S. and Manzanares, P. (2011) Monitoring a mixed starter  
487 of *Hanseniaspora vineae*-*Saccharomyces cerevisiae* in natural must: impact on 2-  
488 phenylethyl acetate production. *Int J Food Microbiol*, **151**, 235-240.
- 489 26. Lleixa, J., Martin, V., Portillo Mdel, C., Carrau, F., Beltran, G. and Mas, A. (2016)  
490 Comparison of Fermentation and Wines Produced by Inoculation of *Hanseniaspora*  
491 *vineae* and *Saccharomyces cerevisiae*. *Front Microbiol*, **7**, 338.
- 492 27. Quiros, M., Rojas, V., Gonzalez, R. and Morales, P. (2014) Selection of non-  
493 *Saccharomyces* yeast strains for reducing alcohol levels in wine by sugar respiration. *Int*  
494 *J Food Microbiol*, **181**, 85-91.
- 495 28. Fleet, G.H. (2003) Yeast interactions and wine flavour. *Int J Food Microbiol*, **86**, 11-22.
- 496 29. Jolly, N.P., Varela, C. and Pretorius, I.S. (2014) Not your ordinary yeast: non-  
497 *Saccharomyces* yeasts in wine production uncovered. *FEMS Yeast Res*, **14**, 215-237.
- 498 30. Swiegers, J.H. and Pretorius, I.S. (2005) Yeast modulation of wine flavor. *Adv Appl*  
499 *Microbiol*, **57**, 131-175.
- 500 31. Lappe-Oliveras, P., Moreno-Terrazas, R., Arrizon-Gavino, J., Herrera-Suarez, T., Garcia-  
501 Mendoza, A. and Gschaedler-Mathis, A. (2008) Yeasts associated with the production of  
502 Mexican alcoholic nondistilled and distilled Agave beverages. *FEMS Yeast Res*, **8**, 1037-  
503 1052.
- 504 32. Li, S.S., Cheng, C., Li, Z., Chen, J.Y., Yan, B., Han, B.Z. and Reeves, M. (2010) Yeast  
505 species associated with wine grapes in China. *Int J Food Microbiol*, **138**, 85-90.
- 506 33. Nova, M.X., Schuler, A.R., Brasileiro, B.T. and Morais, M.A., Jr. (2009) Yeast species  
507 involved in artisanal cachaca fermentation in three stills with different technological  
508 levels in Pernambuco, Brazil. *Food Microbiol*, **26**, 460-466.
- 509 34. Gulitz, A., Stadie, J., Wenning, M., Ehrmann, M.A. and Vogel, R.F. (2011) The  
510 microbial diversity of water kefir. *Int J Food Microbiol*, **151**, 284-288.
- 511 35. Maciel, N.O., Pilo, F.B., Freitas, L.F., Gomes, F.C., Johann, S., Nardi, R.M., Lachance,  
512 M.A. and Rosa, C.A. (2013) The diversity and antifungal susceptibility of the yeasts  
513 isolated from coconut water and reconstituted fruit juices in Brazil. *Int J Food Microbiol*,  
514 **160**, 201-205.
- 515 36. Friedrich, A., Jung, P.P., Hou, J., Neugeglise, C. and Schacherer, J. (2012) Comparative  
516 mitochondrial genomics within and among yeast species of the *Lachancea* genus. *PLoS*  
517 *One*, **7**, e47834.
- 518 37. Shekhawat, K., Bauer, F.F. and Setati, M.E. (2016) Impact of oxygenation on the  
519 performance of three non-*Saccharomyces* yeasts in co-fermentation with *Saccharomyces*  
520 *cerevisiae*. *Appl Microbiol Biotechnol*.
- 521 38. Benito, A., Calderon, F., Palomero, F. and Benito, S. (2016) Quality and Composition of  
522 Airen Wines Fermented by Sequential Inoculation of *Lachancea thermotolerans* and  
523 *Saccharomyces cerevisiae*. *Food Technol Biotechnol*, **54**, 135-144.

- 524 39. Fantès, P.A. and Hoffman, C.S. (2016) A Brief History of *Schizosaccharomyces pombe*  
525 Research: A Perspective Over the Past 70 Years. *Genetics*, **203**, 621-629.
- 526 40. Yukawa, M. and Maki, T. (1931) Regarding the new fission yeast *Schizosaccharomyces*  
527 *Japonicus*. *Kyushu Daigaku Kiyou (Japanese)* 218-226.
- 528 41. Josephsen, J. and Jespersen, L. (2004) In Y. H. Hui, L. M.-G., Ase Solvejg Hansen, Jytte  
529 Josephsen, Wai-Kit Nip, Peggy S. Stanfield, and Fidel Toldra (ed.), *Handbook of Food*  
530 *and Beverage Fermentation Technology (Food Science & Technology)*. CRC Press, pp.  
531 27-58.
- 532 42. Lambrechts, M.G. and Pretorius, I.S. (2000) Yeast and its Importance to Wine Aroma - A  
533 Review. *South African Journal for Enology and Viticulture*, **21**, 97-129.
- 534 43. Woodward, B. (2013), *Haw River Farmhouse Ales*. Blogger,  
535 <http://hawriverales.blogspot.com/2013/01/the-beast-from-yeast-bears-fruit.html>, Vol.  
536 2017.
- 537 44. Bourdichon, F., Casaregola, S., Farrokh, C., Frisvad, J.C., Gerds, M.L., Hammes, W.P.,  
538 Harnett, J., Huys, G., Laulund, S., Ouwehand, A. *et al.* (2012) Food fermentations:  
539 microorganisms with technological beneficial use. *Int J Food Microbiol*, **154**, 87-97.
- 540 45. Laitila, A., Sarlin, T., Raulio, M., Wilhelmson, A., Kotaviita, E., Huttunen, T. and  
541 Juvonen, R. (2011) Yeasts in malting, with special emphasis on *Wickerhamomyces*  
542 *anomalus* (synonym *Pichia anomala*). *Antonie van Leeuwenhoek*, **99**, 75-84.
- 543 46. Timke, M., Wang-Lieu, N.Q., Altendorf, K. and Lipski, A. (2008) Identity, beer spoiling  
544 and biofilm forming potential of yeasts from beer bottling plant associated biofilms.  
545 *Antonie van Leeuwenhoek*, **93**, 151-161.
- 546 47. Masoud, W. and Jespersen, L. (2006) Pectin degrading enzymes in yeasts involved in  
547 fermentation of *Coffea arabica* in East Africa. *Int J Food Microbiol*, **110**, 291-296.
- 548 48. Satora, P., Tarko, T., Sroka, P. and Blaszczyk, U. (2014) The influence of  
549 *Wickerhamomyces anomalus* killer yeast on the fermentation and chemical composition  
550 of apple wines. *FEMS Yeast Res*, **14**, 729-740.
- 551 49. Ye, M., Yue, T. and Yuan, Y. (2014) Effects of sequential mixed cultures of  
552 *Wickerhamomyces anomalus* and *Saccharomyces cerevisiae* on apple cider fermentation.  
553 *FEMS Yeast Res*, **14**, 873-882.
- 554 50. Hazelwood, L.A., Walsh, M.C., Pronk, J.T. and Daran, J.M. (2010) Involvement of  
555 vacuolar sequestration and active transport in tolerance of *Saccharomyces cerevisiae* to  
556 hop iso-alpha-acids. *Applied and environmental microbiology*, **76**, 318-328.

557

558 **Tables**

559 **Table 1.** Wild yeast species diversity and number of isolates.

| <b>Genus</b>         | <b>Species</b>         | <b>Isolates</b> |
|----------------------|------------------------|-----------------|
| <i>Aureobasidium</i> | <i>pullulans</i>       | 2               |
| <i>Brettanomyces</i> | <i>bruxellensis</i>    | 7               |
| <i>Candida</i>       | <i>carphophila</i>     | 1               |
|                      | <i>intermedia</i>      | 1               |
|                      | <i>sake</i>            | 2               |
|                      | <i>tropicalis</i>      | 6               |
|                      | <i>zemplinina</i>      | 1               |
|                      | <i>zeylandoides</i>    | 1               |
| <i>Clavispora</i>    | <i>lusitaniae</i>      | 3               |
| <i>Cryptococcus</i>  | <i>albidus</i>         | 1               |
| <i>Cyberlindnera</i> | <i>fabianii</i>        | 5               |
|                      | <i>rhodanensis</i>     | 1               |
| <i>Debaryomyces</i>  | <i>hansenii</i>        | 7               |
| <i>Hanseniaspora</i> | <i>opuntiae</i>        | 1               |
|                      | <i>uvarum</i>          | 12              |
|                      | <i>valbyensis</i>      | 1               |
|                      | <i>vineae</i>          | 11              |
| <i>Issatchenkia</i>  | <i>orientalis</i>      | 1               |
|                      | <i>terricola</i>       | 3               |
| <i>Kazachstania</i>  | <i>unispora</i>        | 1               |
| <i>Kluyveromyces</i> | <i>lactis</i>          | 10              |
|                      | <i>marxianus</i>       | 10              |
|                      | <i>ohmeri</i>          | 2               |
| <i>Kwoniella</i>     | <i>mangroviensis</i>   | 1               |
| <i>Lachancea</i>     | <i>fermentati</i>      | 8               |
|                      | <i>kluyveri</i>        | 4               |
|                      | <i>thermotolerans</i>  | 25              |
| <i>Metchnikowia</i>  | <i>fruiticola</i>      | 1               |
|                      | <i>pulcherrima</i>     | 1               |
| <i>Meyerozyma</i>    | <i>guilliermondii</i>  | 4               |
| <i>Ogatea</i>        | <i>naganishii</i>      | 1               |
| <i>Pichia</i>        | <i>fermentans</i>      | 3               |
|                      | <i>galeiformis</i>     | 12              |
|                      | <i>guilliermondii</i>  | 2               |
|                      | <i>kluyveri</i>        | 7               |
|                      | <i>kudriavzevii</i>    | 9               |
|                      | <i>manshurica</i>      | 4               |
|                      | <i>membranifaciens</i> | 5               |
|                      | <i>mexicana</i>        | 2               |
|                      | <i>nakazawae</i>       | 2               |



|                            |                     |    |
|----------------------------|---------------------|----|
|                            | <i>quercuum</i>     | 1  |
| <i>Rhodosporidium</i>      | <i>babjevae</i>     | 1  |
|                            | <i>diobovatum</i>   | 1  |
| <i>Rhodotorula</i>         | <i>mucilaginosa</i> | 1  |
| <i>Saccharomyces</i>       | <i>cerevisiae</i>   | 37 |
|                            | <i>kudriavzevii</i> | 1  |
|                            | <i>paradoxus</i>    | 8  |
| <i>Schizosaccharomyces</i> | <i>japonicus</i>    | 2  |
|                            | <i>pombe</i>        | 4  |
| <i>Starmerella</i>         | <i>bacillaris</i>   | 2  |
|                            | <i>bombicola</i>    | 3  |
| <i>Torulaspora</i>         | <i>delbrueckii</i>  | 24 |
| <i>Wickerhamomyces</i>     | <i>anomalus</i>     | 17 |
| <i>Williopsis</i>          | <i>saturnus</i>     | 1  |

---

560

561

562 **Table 2. Lab-scale fermentation and sensory results for representative heterofermentative strains.** The highlighted strains were  
 563 used in Figure 2.

| Strain | Species <sup>a</sup>     | Place of origin     | Collected from        | Attenuation <sup>b</sup> | Final pH <sup>c</sup> | Sensory notes                                                            |
|--------|--------------------------|---------------------|-----------------------|--------------------------|-----------------------|--------------------------------------------------------------------------|
| WYP39  | <i>L. fermentati</i>     | Evansville, IN      | Birch bark            | 60%                      | 3.68                  | Sour, pear, melon, black tea                                             |
| YH25   | <i>L. fermentati</i>     | New River Gorge, WV | Red oak bark          | 60%                      | 3.66                  | Lactic tart finish                                                       |
| YH26   | <i>L. thermotolerans</i> | New River Gorge, WV | Tulip poplar bark     | 60%                      | 3.35                  | Very tart, peach, citrus zest                                            |
| YH27   | <i>L. thermotolerans</i> | New River Gorge, WV | Red oak bark          | 40%                      | 3.42                  | Tart green apple, clean                                                  |
| YH72   | <i>H. vineae</i>         | New Kensington, PA  | Ash bark              | 75%                      | 3.26                  | Slightly sour, clean, tart fruit, apple cider, quaffable                 |
| YH73   | <i>L. thermotolerans</i> | New Kensington, PA  | Mulberries            | 55%                      | 3.36                  | Very sour, berries                                                       |
| YH77   | <i>L. fermentati</i>     | Princeton, NJ       | Red oak bark          | 60%                      | 3.55                  | Tart, clean, pear                                                        |
| YH79   | <i>L. thermotolerans</i> | Holmdel, NJ         | Red oak bark          | 50%                      | 3.42                  | Slightly tart, clean, rounded                                            |
| YH81   | <i>L. thermotolerans</i> | Holmdel, NJ         | White oak bark        | 55%                      | 3.21                  | Tart, fruity, citrus, pear, blood orange                                 |
| YH82   | <i>W. anomalus</i>       | Sarver, PA          | Shumard oak bark      | 83%                      | 3.24                  | Slightly sour, fruity, clean, aromatic, tart fruit, reminiscent of perry |
| YH109  | <i>L. thermotolerans</i> | Indianapolis, IN    | Bell pepper           | 55%                      | 3.39                  | Very sour, clean                                                         |
| YH140  | <i>L. thermotolerans</i> | Bloomington, IN     | Shagbark hickory bark | 50%                      | 3.26                  | Sour, clean, balanced, tea flavors                                       |
| YH156  | <i>S. japonicus</i>      | Northeastern PA     | Oak bark              | 72%                      | 3.88                  | Sour, fruity, green apple Jolly Rancher                                  |

564 <sup>a</sup> The genus abbreviations are: *L.*, *Lachancea*; *H.*, *Hanseniaspora*; *W.*, *Wickerhamomyces*; and *S.*, *Schizosaccharomyces*.

565 <sup>b</sup> The reported attenuation is based on several trial fermentations in various worts.

566 <sup>c</sup> The initial pH was 5.0.

567 **Table 3. Large-scale fermentation data for select heterofermentative yeasts and the**  
568 **WLP001 control.**

| Strain             | Lag time | FG <sup>b</sup> | Final pH <sup>c</sup> | Flocculation | Sensory                                   |
|--------------------|----------|-----------------|-----------------------|--------------|-------------------------------------------|
| WYP39 <sup>a</sup> | 6 h      | 0.099           | 3.74                  | Medium       | Tart, dry, light pineapple & mango        |
| YH72               | 14 h     | 1.000           | 3.23                  | Medium       | Very sour, stone fruit flavors            |
| YH82               | 13 h     | 1.001           | 3.36                  | Medium       | Very sour, pear, apple, and apricot       |
| YH156              | 14 h     | 0.099           | 3.20                  | High         | Sour, intense stone fruit aroma & flavors |
| WLP001             | 12 h     | 1.010           | 4.35                  | Medium       | Neutral, clean, slightly fruity           |

569 <sup>a</sup> WYP39 = *Lachancea fermentati*, YH72 = *Hanseniaspora vineae*, YH82 = *Wickerhamomyces*  
570 *anomalus*, YH156 = *Schizosaccharomyces japonicus*, and WLP001 = *Saccharomyces cerevisiae*.

571 <sup>b</sup> FG, final gravity; original gravity = 1.046 for all fermentations.

572 <sup>c</sup> The starting pH was 5.35 for all fermentations.

573 **Figure Legends**

574

575 **Figure 1. Evolutionary relationships among the wild strains and a commercially available**

576 **ale yeast.** The D1/D2 rDNA sequences of the indicated strains were aligned, and the

577 phylogenetic relationships among them were drawn as a rooted N-J tree using

578 *Schizosaccharomyces pombe* as the outgroup. From top to bottom, the *S. japonicus* strains are

579 highlighted purple, the *W. anomalus* strains are red, the *H. vineae* strains are green, the *L.*

580 *fermentati* strains are dark blue, and the *L. thermotolerans* strains are light blue. *S. cerevisiae*

581 strain WLP001 is not highlighted and occupies the relative midpoint of the phylogenetic tree.

582 **Figure 2. Lactic acid production.** A) LASSO assay for lactic acid production by the indicated

583 strains. Cells producing lactic acid develop a dark halo. Images of both the top and bottom of a

584 representative LASSO plate are shown. *S. cerevisiae* WLP001 and LAB (*L. plantarum*) were

585 included as negative and positive controls for lactic acid production, respectively. These results

586 are indicative of three independent experiments using the same strains. B) Multi-well plate assay

587 for lactic acid production. Cell growth medium containing lactic acid turns from gold to green

588 when the enzymatic assay is complete. Multiple strains of *L. thermotolerans*, *L. fermentati*, *H.*

589 *vineae*, and LAB were tested, as well as *S. japonicus* YH156 (*Sj*), *W. anomalus* YH82 (*Wa*), *S.*

590 *cerevisiae* WLP001, and *Escherichia coli* DH5 $\alpha$  (*E. coli*). WLP001 and *E. coli* served as

591 negative controls for lactic acid production by yeast and bacteria, respectively. *L. plantarum* (left

592 LAB well) and *L. brevis* (right LAB well) were used as positive controls for lactic acid

593 production. C) L-lactate quantification. Typical GC-MS spectra of the lactate standard (solid red

594 line) and isolated lactate from beer samples are shown. HV (solid purple line), WA (solid green

595 line), LF (dashed burnt sienna line), and SJ (dashed black line) represent beers fermented with *H.*

596 *vineae* YH72, *W. anomalus* YH82, *L. fermentati* WYP39, and *S. japonicus* YH156, respectively.  
597 “Caul” (solid black line) represents the lactate isolated from Cauldron, a positive control for  
598 lactate in beer (See Section 2.6 and (17)).

599 **Figure 3. Comparison of kettle souring, wood-aged souring, and primary souring. Left)**

600 During kettle souring, unhopped or lightly hopped wort is produced in a brew kettle as normal,  
601 but then it is only partially cooled to approximately 40-45°C. This temperature favors the growth  
602 of LAB, which can be introduced by inoculation with pure cultures or the addition of grain. The  
603 LAB then sour the wort in the brew kettle to the desired pH, which usually occurs over the  
604 course of 24-48 h. The soured wort in the kettle is ultimately boiled a second time to kill the  
605 LAB, and hops can be introduced at this point. The wort is then transferred to a fermenter and  
606 (typically) inoculated with *S. cerevisiae* for primary fermentation. Middle) During mixed culture  
607 souring, lightly hopped wort is produced in the brew kettle and transferred to a fermenter. There,  
608 it can be inoculated with *S. cerevisiae* for primary fermentation. In some cases, LAB are added  
609 prior to or concurrently with *S. cerevisiae* (or *Brettanomyces* spp. in 100% “Brett” beers). If the  
610 LAB are added at this stage, souring begins during primary fermentation. After the yeast has  
611 attenuated the beer to the desired level, it is then barrel aged for months or years until it attains a  
612 low pH and complex flavor profile. Barrel aging is another stage at which LAB and  
613 *Brettanomyces* spp. can be added (either resident in the barrels or as pure inocula) to induce  
614 souring. Right) Primary souring: see the text in Section 4.6 for details.

*Schizosaccharomyces japonicus*

YH156  
YH157

*Wickerhamomyces  
anomalous*

WYP72  
WYP65  
WYP67  
WYP30  
WYP77  
YH98  
WYP78  
YH102  
WYP38  
WYP29  
YH97  
YH82  
WYP22  
YH62  
YH167  
WYP9  
WYP17

*Saccharomyces cerevisiae*

WLP001

*Hanseniaspora  
vineae*

YH72  
YH46  
WYP53  
YH47  
YH130  
YH133  
WYP55  
WYP52  
YH92  
YH93

*Lachancea  
fermentati*

YH25  
WYP35  
WYP37  
WYP39  
YH77  
YH127  
YH31  
YH126

*Lachancea thermotolerans*

WYP57  
YH73  
YH57  
YH70  
YH71  
YH75  
YH129  
YH32  
YH79  
YH78  
YH111  
YH74  
YH140  
YH171  
YH121  
YH154  
YH81  
YH128  
YH27  
YH80  
YH26  
YH109  
YH36  
YH39  
YH175

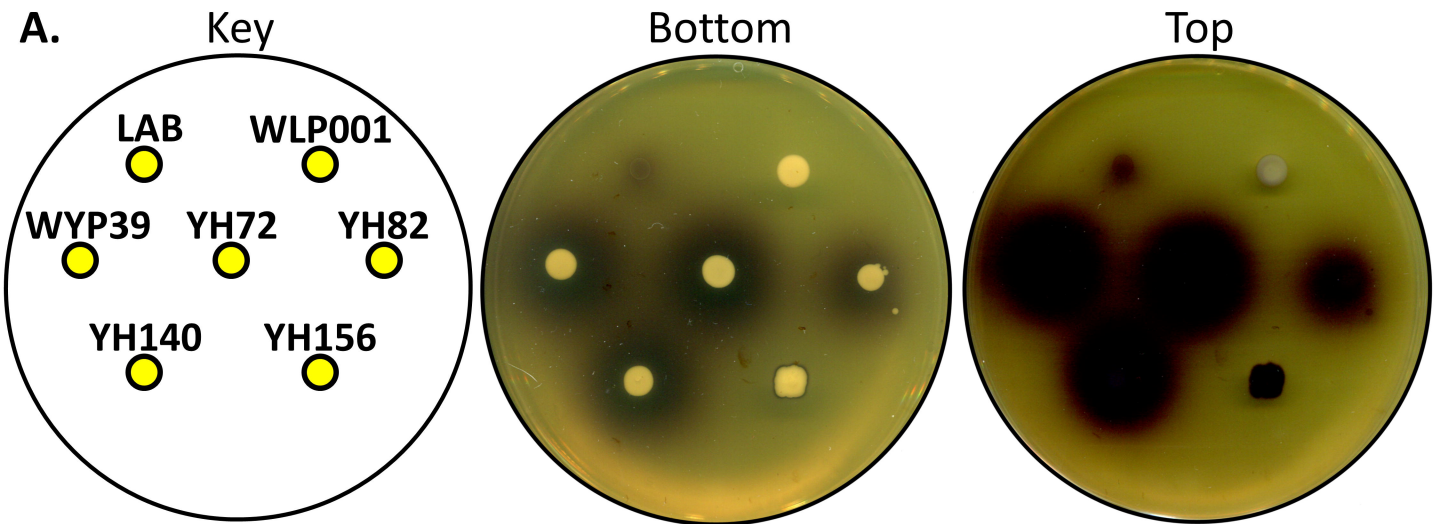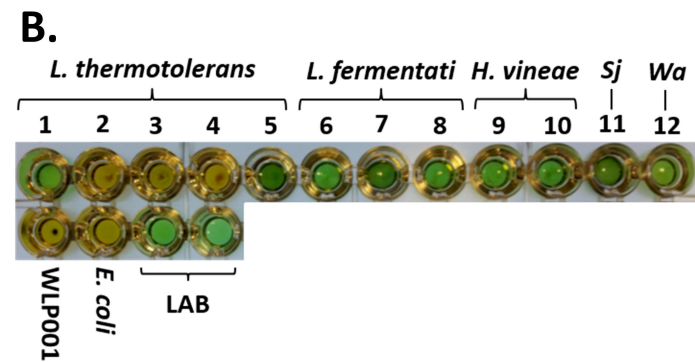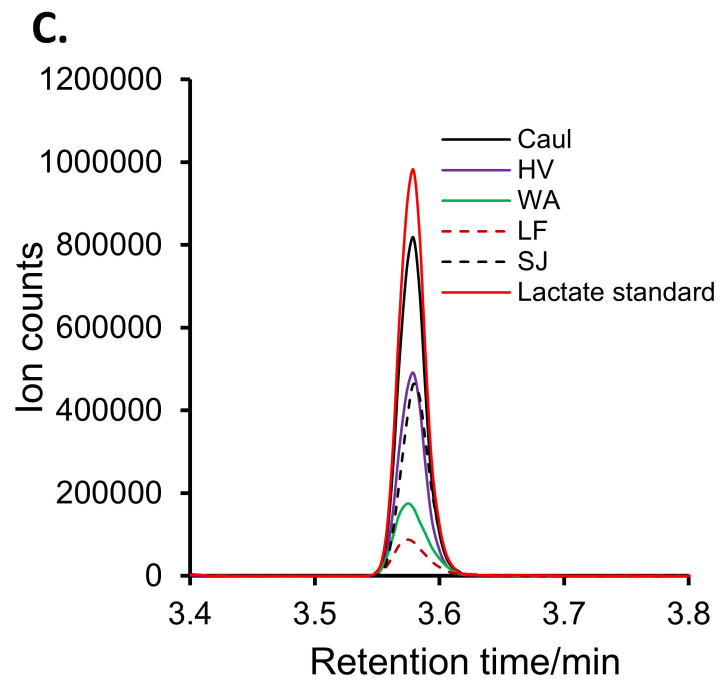



## Kettle souring (fast souring)

Wort production  
↓  
Cool to ~45°C  
↓  
Inoculate with LAB  
↓  
**Incubate at ~45°C for 48 h**  
↓  
Boil the soured wort  
↓  
Primary fermentation

Occurs in the brew kettle

## Mixed culture souring (long-term souring)

Wort production  
↓  
Inoculation with yeast (and LAB)  
↓  
**Primary fermentation**  
↓  
**Barrel aging (months to years)**

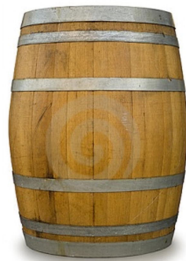

Barrels may contain additional yeasts and/or LAB, or a secondary microbe inoculation is performed.

## Primary souring

Wort production  
↓  
Inoculation with heterofermentative yeast  
↓  
**Primary fermentation (2-4 weeks)**  
⋮  
Could be followed by fruit addition, barrel aging, etc.

Key: red text denotes when lactic acid production occurs
